# Supplementary material
Source: HighWire-hosted journal article supplement (https://fn.bmj.com/content/108/6/569)
Supplement: inline-supplementary-material-3 [file inline-supplementary-material-3.pdf]

**Online Supplementary eFigure 2:** Example of Round 3 eDelphi view.

Different Stakeholder Groups average rankings were colour coded (Purple for parents/ former patients, Orange for nurses/ allied healthcare and grey for doctors/ researchers) . This was explained to participants in the key above each speciality domain and also in the introductory paragraph of the priority setting exercise.

| Parents/ Families/ Former Patients group is represented by this background colour                                                                                                |                                      |               |    |    |                            |     |     |          |     |    |                |
|----------------------------------------------------------------------------------------------------------------------------------------------------------------------------------|--------------------------------------|---------------|----|----|----------------------------|-----|-----|----------|-----|----|----------------|
| Nurses/ Allied Health/ Psychologists group is represented by this background colour                                                                                              |                                      |               |    |    |                            |     |     |          |     |    |                |
| Doctors/ Researchers group is represented by this background colour                                                                                                              |                                      |               |    |    |                            |     |     |          |     |    |                |
| Research question                                                                                                                                                                | Number of people rating this outcome | Not important |    |    | Important but not critical |     |     | Critical |     |    | Unable to rate |
|                                                                                                                                                                                  |                                      | 1             | 2  | 3  | 4                          | 5   | 6   | 7        | 8   | 9  |                |
| <b>Respiratory</b>                                                                                                                                                               |                                      |               |    |    |                            |     |     |          |     |    |                |
| 3) In extremely preterm infants < 28 weeks does routine high frequency oscillatory ventilation (HFOV) improve survival, cognition and BPD when compared to standard ventilation? | 6                                    | 0%            | 0% | 0% | 0%                         | 0%  | 0%  | 83%      | 17% | 0% |                |
|                                                                                                                                                                                  | 20                                   | 0%            | 0% | 0% | 15%                        | 10% | 10% | 55%      | 10% | 0% |                |
|                                                                                                                                                                                  | 65                                   | 0%            | 0% | 2% | 8%                         | 9%  | 35% | 37%      | 6%  | 3% |                |

Bronchopulmonary Dysplasia (BPD)
